# Supplementary material
Source: PubMed Central journal article supplement (PMC9133176)
Supplement: NIHMS1800214-supplement-Supplemental_Publication_Material.pdf [file NIHMS1800214-supplement-Supplemental_Publication_Material.pdf]

## 1 SUPPLEMENTAL MATERIAL

### 2 3 **Methods**

4 This study was approved by the local institutional review board. Patient consent was  
5 obtained from the patient, or a surrogate if appropriate.

#### 6 ***Study design and population***

7 The study was a prospective observational study that included patients admitted to a tertiary  
8 center with a dedicated Neuroscience Intensive Care Unit. The enrollment period was from  
9 January 2018 to August 2021. Inclusion criteria were patients presenting age 18 or older with SAH  
10 secondary to a ruptured aneurysm. SAH was diagnosed by initial computed tomography (CT) scan  
11 or by xanthochromia in the cerebrospinal fluid if the CT was not diagnostic. CTA (computerized  
12 tomographic angiography) or conventional diagnostic angiogram was used to confirm the presence  
13 of a culprit aneurysm. SAH from secondary etiology such as trauma, dissection, vascular  
14 malformation, admission after 72 hours from ictus, and patients with known coagulopathy or  
15 history of anticoagulants were excluded.

#### 16 ***Assessment of clinical parameters***

17 Data collected included basic demographic data including age, sex, race, past medical  
18 history, medication history. Clinical severity was assessed by the Hunt-Hess score (HH) and  
19 radiological scans were graded using the Fisher scale. Patients were classified as having DCI based  
20 on accepted published standards.<sup>1</sup> The definition of DCI used in the study: “*The occurrence of*  
21 *focal neurological impairment (such as hemiparesis, aphasia, apraxia, hemianopia, or neglect),*  
22 *or a decrease of at least 2 points on the Glasgow Coma Scale (either on the total score or on one*  
23 *of its individual components [eye, motor on either side, verbal]). This should last for at least 1*  
24 *hour, is not apparent immediately after aneurysm occlusion, and cannot be attributed to other*  
25 *causes by means of clinical assessment, CT or MRI scanning of the brain, and appropriate*  
26 *laboratory studies””. Initial laboratory findings collected included complete blood count, basic  
27 metabolic profile, standard coagulation profile (INR, PT/PTT) and TEG. Modified Rankin Scale  
28 (mRS) score at 3 months was used to assess the outcome. Good clinical outcomes were defined as  
29 a mRS 0-2, and poor clinical outcomes were defined as a mRS of 3-6. All patients underwent  
30 treatment of the aneurysm within 24 hours. Protocolized standard of care was applied to all  
31 patients. All patients were allowed permissive hypertension and patients with DCI underwent  
32 augmented blood pressure and angiography with treatment if necessary. All patients received deep  
33 venous thrombosis (DVT) prophylaxis within 24 hours of treatment. Only the first time point of  
34 TEG was obtained prior to DVT prophylaxis initiation in all patients.*

#### 35 36 ***Thromboelastography (TEG) data collection***

37 To assess the coagulation profile trends over time, TEG was performed at 5 predetermined  
38 time points: at <24 hours (T<sub>1</sub>), at 24-48 hours (T<sub>2</sub>), at 3-5 days (T<sub>3</sub>), 6-9 days (T<sub>4</sub>), and after 10 days  
39 (T<sub>5</sub>) of admission. Each blood sample was analyzed by trained personal for TEG analysis within  
40 an hour of draw. Serial TEG tests were performed on the same computerized TEG coagulation  
41 analyzer (Haemonetics Corp, Model 5000; Braintree, Mass).

42 TEG parameters included R (time to clot initiation), K (time to thrombin-platelet  
43 interaction, 20mm clot strength), MA (maximum clot strength), G value (calculate value of clot  
44 strength), alpha angle (rate of fibrin cross linking) and LY30 (measure of clot lysis). The  
45 parameters are described in table S1 and figure S1.

#### 46 ***Statistical Analysis***

47 Continuous variables were presented as mean and standard deviation (SD). Categorical  
48 variables were presented as frequencies and percentages. The two-tailed Student's t test and  
49 Fisher's exact test were used for comparisons of demographics, initial severity of SAH (HH, GCS),  
50 and TEG values.

51 Multivariable logistic regression model was performed for comparing outcome groups  
52 while adjusting for potential confounders detected on univariate analysis. Bar graphs with error  
53 bars were plotted while the lower and upper ends of the error bars stand for mean - standard error  
54 and mean + standard error, respectively. Area under the receiver operating characteristic curve  
55 (AUC) was used to quantify the discriminative power of each single TEG parameter, and heatmaps  
56 were plotted to visualize the results. Statistically significant difference was defined as P value  
57 <0.05. All analyses were conducted using R version 4.0.5.

## 58 **Results**

### 59 ***Patient population and baseline TEG***

60 During the study period, 201 patients met the inclusion criteria and were enrolled in the  
61 study and underwent serial TEG measurements. The mean age at presentation was 53.6 (range:  
62 22-84). Of those patients, 69.7% were female. DCI was seen in 70 patients (34.8%). 144 patients  
63 had outcome data at 3 months. Poor mRS was seen in 63 (44%) of patients. Classical parameters  
64 associated with poor outcomes included older age ( $p<0.001$ ), higher Hunt Hess grade on arrival  
65 ( $p<0.001$ ) and lower Glasgow Coma Scale ( $p<0.001$ ). There was no difference in outcomes for  
66 clipped versus coiled patients. On univariate analysis, G value on admission was significantly  
67 higher in patients with higher HH grade (**12.5 vs 11.1,  $p= 0.009$** ). K and angle also demonstrated  
68 hypercoagulability in higher grades ( **$p= 0.04$  for both**). Patients' characteristics and demographics  
69 are summarized tables S2 and S3.

### 70 ***TEG and clinical outcomes***

71 mRS was dichotomized into good (0-2) versus poor (3-6). 144 patients had outcomes data  
72 at 3 months. TEG parameters across the different timepoints were compared between the two  
73 groups. While several TEG parameters did show a significant difference at some point along the  
74 timeline on univariate analysis, the MA and G-value were the only two indices to maintain  
75 significance with multivariate analysis. MA was significantly elevated in patients with poor mRS  
76 compared to those with good mRS at T<sub>1</sub> and T<sub>5</sub> ( **$p= 0.019$  for T<sub>1</sub> and  $0.043$  for T<sub>5</sub>**). The G-value  
77 (calculated clot strength) was also significantly higher in patients with poor outcomes on T<sub>5</sub> ( **$p=$**   
78 **0.017**). These findings were consistent with findings in other studies.<sup>2</sup> Figure 1A demonstrates  
79 these two indices across different timepoints in relation to mRS.

### 80 ***TEG and delayed cerebral ischemia***

81 Patients was dichotomized into a group with DCI (n=70) and one without (n=131). Of the  
82 TEG parameters, R ( **$p= 0.03$** ), Angle ( **$p=0.023$** ) and K ( **$p= 0.04$** ) showed a significant difference  
83 between the two groups on multivariate analysis, however it was only evident on T4 (time point  
84 at occurrence of DCI).

### 85 ***TEG is not predictive of neither outcomes nor development of delayed cerebral ischemia***

86 The different TEG parameters were tested as a predictive biomarker for poor outcomes. A  
87 receiver operating characteristic (ROC) curve was generated for each parameter at each time point.  
88 None of the generated curves demonstrated an acceptable area under the curve (AUC) for clinical  
89 use. Similarly, we conducted this analysis in relation to DCI. Each individual time point (until  
90 occurrence of DCI) of each parameter was plotted for an ROC curve to predict DCI. No parameter  
91 timepoint was successful. Figure 1B summarizes such findings in a heat map.

92



| <b>TEG</b>         | <b>Definition</b>                                                                                | <b>Reference</b> | <b>Units</b> |
|--------------------|--------------------------------------------------------------------------------------------------|------------------|--------------|
| R                  | Reaction time to clot formation, thrombin & fibrin formation                                     | 3 - 8            | minutes      |
| K                  | Time from end of R until clot reaches 20 mm, speed of fibrin crosslinking & platelet interaction | 1 - 3            | minutes      |
| Angle ( $\alpha$ ) | Tangent of the curve made reaching K, fibrin cross linking                                       | 55 - 78          | degrees      |
| MA                 | Maximum strength of clot, platelet-fibrin interaction                                            | 51 - 69          | mm           |
| G                  | Log-derivation of MA, platelet-fibrin interaction                                                | 5 - 12           | Dynes/sec    |
| LY30               | % lysis 30 minutes after MA, clot stability                                                      | 0 - 8            | %            |

94 **Table S1.** TEG parameters and definitions

|                                   | No DCI (N=131) | DCI (N=70)   | Total (N=201) | p-value      |
|-----------------------------------|----------------|--------------|---------------|--------------|
| <b>Age</b>                        |                |              |               | <b>0.256</b> |
| Mean (SD)                         | 52.7 (14.3)    | 55.1 (13.6)  | 53.6 (14)     |              |
| Range                             | 22.0 - 81.0    | 26.0 - 84.0  | 22.0 - 84.0   |              |
| <b>Gender</b>                     |                |              |               | <b>0.199</b> |
| Female                            | 87 (66.4%)     | 53 (75.7%)   | 140 (69.7%)   |              |
| <b>Race</b>                       |                |              |               | <b>0.575</b> |
| Black                             | 23 (17.6%)     | 16 (22.9%)   | 39 (19.4%)    |              |
| White                             | 99 (75.6%)     | 51 (68.9%)   | 150 (74.6%)   |              |
| Asian                             | 9 (6.9%)       | 3 (4.3%)     | 12 (6.0%)     |              |
| <b>HTN</b>                        |                |              |               | <b>0.363</b> |
| Yes                               | 76 (58.0%)     | 46 (65.7%)   | 122 (60.7%)   |              |
| <b>Aspirin</b>                    |                |              |               | <b>1.000</b> |
| No                                | 107 (81.7%)    | 57 (81.4%)   | 164 (81.16%)  |              |
| <b>Clopidogrel</b>                |                |              |               | <b>1.000</b> |
| No                                | 124 (94.7%)    | 67 (95.7%)   | 191 (95.0%)   |              |
| <b>Intervention</b>               |                |              |               | <b>0.546</b> |
| Clipped                           | 53 (40.5%)     | 25 (35.7%)   | 78 (38.8%)    |              |
| Coiled                            | 78 (59.5%)     | 45 (64.3%)   | 123 (61.2%)   |              |
| <b>GCS</b>                        |                |              |               | <b>0.103</b> |
| Mean (SD)                         | 11 (3.9)       | 10.1 (4.0)   | 10.7 (4.0)    |              |
| Range                             | 3.0 - 15.0     | 3.0 - 15.0   | 3.0 - 15.0    |              |
| <b>Hunt Hess on arrival (1-5)</b> |                |              |               | <b>0.009</b> |
| Mean (SD)                         | 2.9 (0.9)      | 3.2 (0.9)    | 3.0 (0.9)     |              |
| Range                             | 1.0 - 5.0      | 2.0 - 5.0    | 1.0 - 5.0     |              |
| <b>Fisher scale</b>               |                |              |               | <b>1.000</b> |
| <b>1-2</b>                        | 4 (3.1%)       | 2 (2.9%)     | 6 (3.0%)      |              |
| <b>3-4</b>                        | 127 (96.9%)    | 68 (97.1%)   | 195 (97.0%)   |              |
| <b>Platelet, Mean (SD)</b>        | 241.3 (64.7)   | 238.5 (72.4) | 240.3 (67.4)  | <b>0.776</b> |

|                       |             |            |             |              |
|-----------------------|-------------|------------|-------------|--------------|
| <b>PTT, Mean (SD)</b> | 29.5 (17.2) | 28.6 (7.0) | 29.1 (14.4) | <b>0.698</b> |
| <b>INR, Mean (SD)</b> | 1.0 (0.1)   | 1.1 (0.5)  | 1.0 (0.3)   | <b>0.118</b> |

96 **Table S2.** Baseline characteristics and demographics for enrolled patients

97

|                                   | Poor mRS (N=63) | Good mRS (N=81) | Total (N=144) | p-value |
|-----------------------------------|-----------------|-----------------|---------------|---------|
| <b>Age</b>                        |                 |                 |               | < 0.001 |
| Mean (SD)                         | 58.7 (12.7)     | 49.0 (13.9)     | 53.3 (14.1)   |         |
| Range                             | 26.0 - 84.0     | 22.0 - 77.0     | 22.0 - 84.0   |         |
| <b>Gender</b>                     |                 |                 |               | 0.583   |
| Female                            | 46 (73.0%)      | 55 (67.9%)      | 101 (70.1%)   |         |
| <b>Race</b>                       |                 |                 |               | 0.854   |
| Black                             | 13 (20.6%)      | 13 (16.0%)      | 26 (18.1%)    |         |
| White                             | 47 (74.6%)      | 64 (79.0%)      | 111 (77.1%)   |         |
| Asian                             | 3 (4.8%)        | 4 (4.9%)        | 7 (4.9%)      |         |
| <b>HTN</b>                        |                 |                 |               | 0.025   |
| Yes                               | 46 (73.0%)      | 44 (54.3%)      | 90 (62.5%)    |         |
| <b>Aspirin</b>                    |                 |                 |               | 1.000   |
| No                                | 52 (82.5%)      | 66 (81.5%)      | 118 (81.9%)   |         |
| <b>Plavix (Clopidogrel)</b>       |                 |                 |               | 1.000   |
| No                                | 60 (95.2%)      | 78 (96.3%)      | 138 (95.8%)   |         |
| <b>Intervention</b>               |                 |                 |               | 0.597   |
| Clipped                           | 20 (31.7%)      | 30 (37.0%)      | 50 (34.7%)    |         |
| Coiled                            | 43 (68.3%)      | 51 (63.0%)      | 94 (65.3%)    |         |
| <b>GCS</b>                        |                 |                 |               | < 0.001 |
| Mean (SD)                         | 8.6 (4.2)       | 11.7 (3.5)      | 10.3 (4.1)    |         |
| Range                             | 3.0 - 15.0      | 3.0 - 15.0      | 3.0 - 15.0    |         |
| <b>Hunt Hess on arrival (1-5)</b> |                 |                 |               | < 0.001 |
| Mean (SD)                         | 3.4 (1.0)       | 2.6 (0.8)       | 3.0 (0.9)     |         |
| Range                             | 1.0 - 5.0       | 1.0 - 5.0       | 1.0 - 5.0     |         |
| <b>Fisher scale</b>               |                 |                 |               | 0.504   |
| 1-2                               | 0 (0.0%)        | 2 (2.5%)        | 2 (1.4%)      |         |
| 3-4                               | 63 (100.0%)     | 79 (97.5%)      | 142 (98.6%)   |         |
| <b>Platelet, mean (SD)</b>        | 230.6 (69.2)    | 245.0 (64.1)    | 238.7 (66.5)  | 0.199   |
| <b>PTT, mean (SD)</b>             | 30.8 (23.5)     | 28.7 (6.9)      | 29.6 (16.4)   | 0.484   |
| <b>INR, mean (SD)</b>             | 1.0 (0.1)       | 1.1 (0.5)       | 1.1 (0.4)     | 0.458   |

**Table S3.** Baseline characteristics and demographics for enrolled patients with 3 months follow up

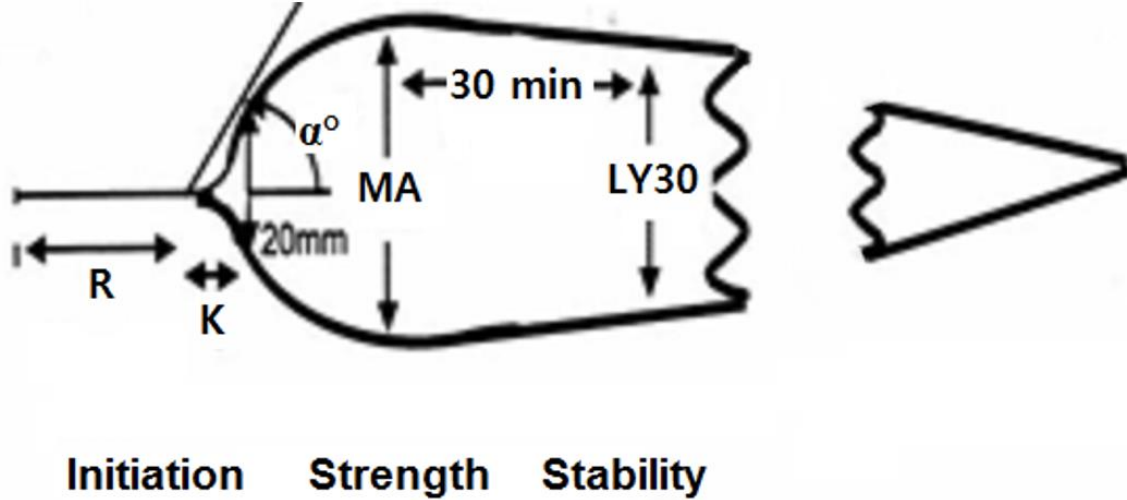102  
103

104 **Figure S1.** Definition and reference range of parameter of thromboelastography (TEG).  
 105 Schematic trace of TEG shows change of each TEG parameters from initiation to fibrinolysis of  
 106 clot. Definitions and reference ranges of each parameter are explained in table S1.

107

108

- 109 1. Vergouwen MD, Vermeulen M, van Gijn J, et al. Definition of delayed cerebral ischemia  
 110 after aneurysmal subarachnoid hemorrhage as an outcome event in clinical trials and  
 111 observational studies: proposal of a multidisciplinary research group. *Stroke*.  
 112 2010;41(10):2391-2395.
- 113 2. Ramchand P, Nyirjesy S, Frangos S, et al. Thromboelastography Parameter Predicts  
 114 Outcome After Subarachnoid Hemorrhage: An Exploratory Analysis. *World Neurosurg*.  
 115 2016.

116
